# Supplementary material for: A transparent TiO2–C@TiO2–graphene free-standing film with enhanced visible light photocatalysis
Source: Royal Society of Chemistry journal article supplement (doi:10.1039/c6ra07993h), 2016-01-01
Supplement: c6ra07993h1.pdf [file c6ra07993h1.pdf]

## Supplementary Material

### Transparent TiO<sub>2</sub>-C@TiO<sub>2</sub>-graphene free-standing film with enhanced visible light photocatalysis

Luyang Hu,<sup>\*,a</sup> Yumin Zhang,<sup>b</sup> Shanmei Zhang,<sup>c</sup> and Benxia Li<sup>a</sup>

*<sup>a</sup>School of Materials Science and Engineering, Anhui University of Science & Technology,  
Huainan, 232001, China.*

*<sup>b</sup>National Key Laboratory of Science and Technology on Advanced Composites in Special  
Environment, Harbin, 150001, China*

*<sup>c</sup>School of Science, Anhui University of Science & Technology, Huainan, 232001, China*

\*Correspondence author.

Tel.:86-554-6668643; E-mail: Huluyang@aliyun.com

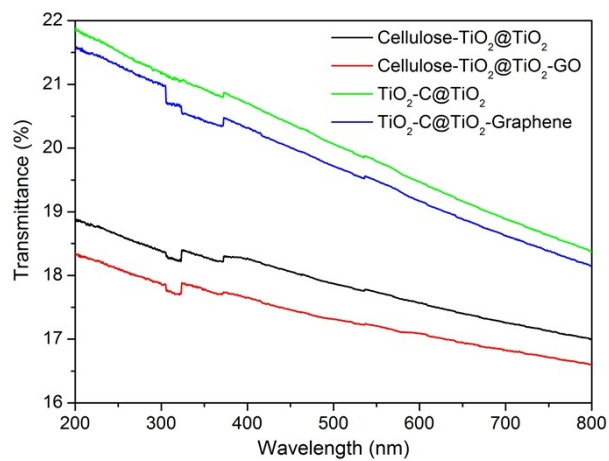

Fig. S1 UV-Vis transmittance spectra of the samples.

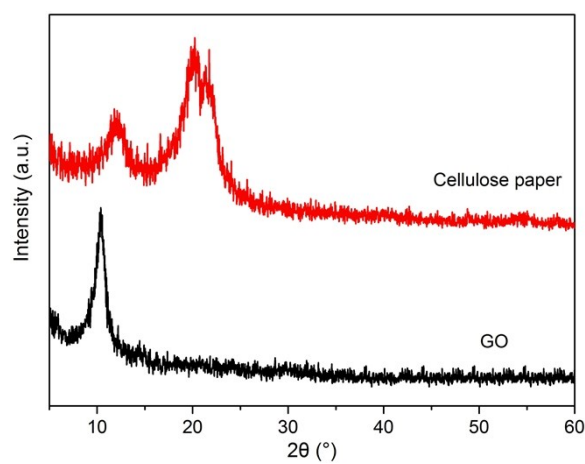

Fig. S2 XRD patterns of GO and cellulose paper.

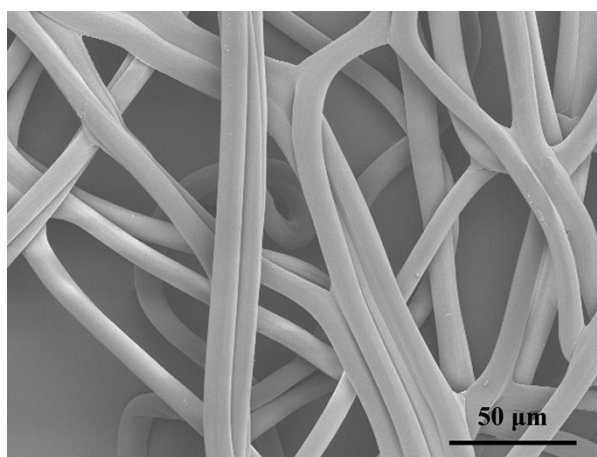

Fig. S3 SEM image of cellulose paper.

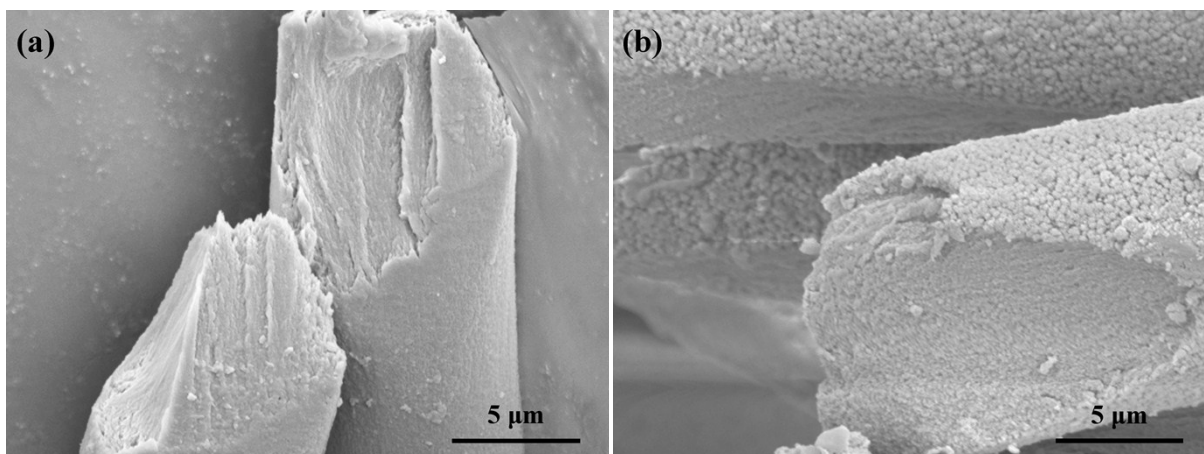

Fig. S4 SEM images of fiber fracture surface of (a) cellulose paper and (b) cellulose-TiO<sub>2</sub>@TiO<sub>2</sub> film.

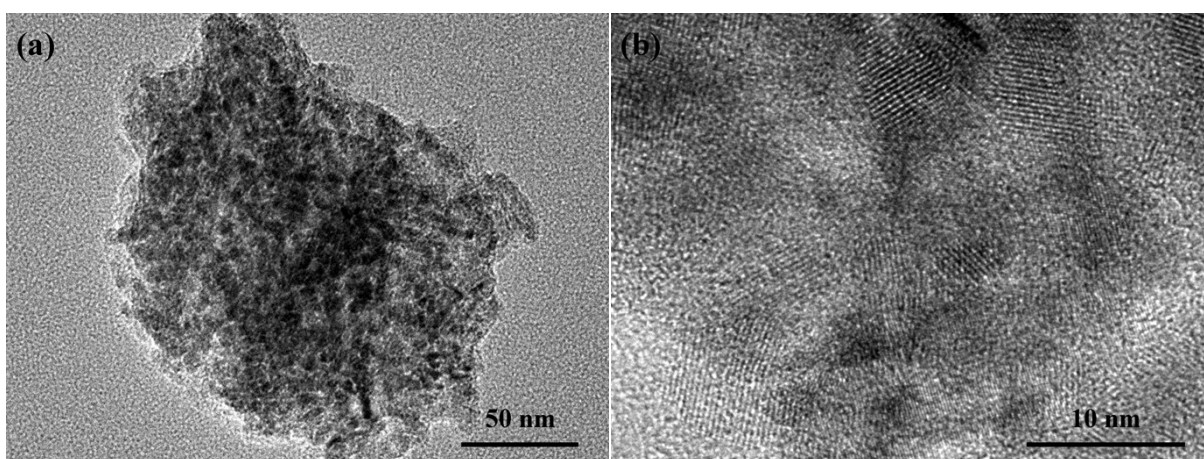

Fig. S5 (a) TEM image and (b) HRTEM image of TiO<sub>2</sub>-C.
